# Supplementary material
Source: PubMed Central journal article supplement (PMC6014540)
Supplement: DC172419SupplementaryData.pdf [file DC172419SupplementaryData.pdf]

## SUPPLEMENTARY DATA

**Supplementary Table 1.** Descriptive characteristics in the CF participants, categorized by glycemic group

|                                               | CF NGT<br>N=24                           | CF AGT<br>N=41                           | CFRD<br>N=28                             | p-value  |
|-----------------------------------------------|------------------------------------------|------------------------------------------|------------------------------------------|----------|
| Age (years)                                   | 13±3                                     | 14±3                                     | 14±2                                     | 0.14     |
| Male, n (%)                                   | 11 (46)                                  | 22 (54)                                  | 11 (39)                                  | 0.49     |
| BMI z-score                                   | -0.25±0.8                                | 0.11±0.9                                 | -0.22±0.7                                | 0.12     |
| Weight (kg)                                   | 44.5±11.3                                | 51.6±15.1                                | 50.3±11.2                                | 0.11     |
| Height (cm)                                   | 154.6±13.1                               | 158.1±14.8                               | 160.2±10.6                               | 0.31     |
| Genotype, n (%)                               |                                          |                                          |                                          | 0.20     |
| Class I-III                                   | 20 (83.3)                                | 35 (89.7)                                | 27 (96.4)                                |          |
| Class IV-V                                    | 3 (12.5)                                 | 1 (2.6)                                  | 0 (0.0)                                  |          |
| Unidentified                                  | 1 (4.2)                                  | 3 (7.7)                                  | 1 (3.6)                                  |          |
| Pancreatic insufficient, n (%)                | 22 (92)                                  | 40 (98)                                  | 28 (100)                                 | 0.34     |
| G-Tube feedings, n (%)                        | 5 (21)                                   | 6 (15)                                   | 7 (25)                                   | 0.55     |
| CFTR modulator use, n (%)                     | 9 (38)                                   | 16 (39)                                  | 3 (11)                                   | 0.03*    |
| Insulin use, n (%)                            | 2 (9)                                    | 4 (10)                                   | 17 (61)                                  | <0.0001* |
| FVC%                                          | 98±10                                    | 98±15                                    | 98±14                                    | 0.99     |
| FEV1%                                         | 92±10                                    | 89±16                                    | 90±15                                    | 0.73     |
| Fasting plasma glucose (mg/dl)                | 89±5                                     | 98±9                                     | 103±37                                   | 0.07     |
| 1hr plasma glucose                            | 152±26                                   | 207±55                                   | 256±59                                   | <0.0001† |
| 2hr plasma glucose                            | 111±16                                   | 141±31                                   | 227±39                                   | <0.0001† |
| HbA1c % (mmol/mol)                            | 5.4±0.3 (36±3)                           | 5.6±0.3 (38±3)                           | 6.0±1.3 (42±14)                          | 0.02*    |
| Fructosamine (mmol/L)                         | 240±18                                   | 235±20                                   | 257±52                                   | 0.02‡    |
| Total albumin (g/dL)                          | 4.4±0.4                                  | 4.2±0.3                                  | 4.2±0.4                                  | 0.15     |
| Glycated albumin (%)                          | 12.5±0.7                                 | 12.4±1.1                                 | 14.3±4.4                                 | 0.01*    |
| 1,5-anhydroglucitol (mcg/ml)                  | 20.7±7.0                                 | 18.7±6.8                                 | 17.6±8.3                                 | 0.32     |
| <b>Continuous Glucose Monitoring Measures</b> |                                          |                                          |                                          |          |
| Average glucose (mg/dl)                       | 108±12                                   | 113±15                                   | 126±47                                   | 0.06     |
| Average day glucose (mg/dl)                   | 110±11                                   | 115±14                                   | 129±51                                   | 0.06     |
| Average night glucose (mg/dl)                 | 104±16                                   | 110±18                                   | 121±40                                   | 0.07     |
| Maximum day glucose (mg/dl)                   | 196±30                                   | 218±61                                   | 232±69                                   | 0.09     |
| Maximum night glucose (mg/dl)                 | 159±37                                   | 173±52                                   | 174±63                                   | 0.52     |
| Minimum glucose (mg/dl)                       | 61±14                                    | 65±13                                    | 61±13                                    | 0.49     |
| Average AUC/day (mg/min/dl)                   | 1.6x10 <sup>5</sup> ±1.7x10 <sup>4</sup> | 1.6x10 <sup>5</sup> ±2.1x10 <sup>4</sup> | 1.8x10 <sup>5</sup> ±6.8x10 <sup>4</sup> | 0.06     |
| # Excursions >140/day                         | 2.8±1.7                                  | 2.8±1.5                                  | 2.6±1.4                                  | 0.81     |
| # Excursions >200/day                         | 0.3±0.4                                  | 0.5±0.8                                  | 0.6±0.8                                  | 0.16     |
| % time >140 mg/dl                             | 8.4±6.3                                  | 12.7±13.8                                | 18.9±23.7                                | 0.07     |
| % time >200 mg/dl                             | 0.3±0.6                                  | 1.4±2.9                                  | 7.4±22                                   | 0.08     |
| % time <70 mg/dl                              | 3.5±6.1                                  | 2.1±3.1                                  | 2.1±3.4                                  | 0.39     |
| % time <60 mg/dl                              | 1.9±4.6                                  | 0.8±1.9                                  | 0.7±1.5                                  | 0.21     |
| Standard deviation (mg/dl)                    | 21±5                                     | 24±9                                     | 29±19                                    | 0.07     |
| Coefficient of variation                      | 0.19±0.05                                | 0.21±0.07                                | 0.22±0.06                                | 0.49     |
| MAGE (mg/dl)                                  | 50±16                                    | 57±26                                    | 67±36                                    | 0.08     |

Data presented as Mean (SD) unless otherwise indicated

NGT = normal glycemic tolerance; AGT = abnormal glycemic tolerance; CFRD = cystic fibrosis related diabetes; HbA1c=hemoglobin A1c; BMI=body mass index; FEV1=forced expiratory volume in 1 sec; FVC=forced vital capacity; AUC=area under the curve; MAGE=mean amplitude of glycemic excursions

\*CFRD significantly different from both NGT and AGT

†All groups significantly different from each other

‡AGT significantly different from CFRD
